# Supplementary material for: Preparation of CL-20/TFAZ cocrystals under aqueous conditions: balancing high performance and low sensitivity
Source: Royal Society of Chemistry journal article supplement (doi:10.1039/c9ce01221d), 2019-01-01
Supplement: c9ce01221d1.pdf [file c9ce01221d1.pdf]

## **Supplementary information**

### **Preparation of CL-20/TFAZ cocrystals under aqueous condition: balancing high performance and low sensitivity**

Ning Liu,\* Binghui Duan, Xianming Lu, Qian Zhang, Minghui Xu, Hongchang Mo  
and Bozhou Wang

Email: [flackliu@sina.com](mailto:flackliu@sina.com)

#### **Table of Contents**

- 1. X-ray crystallography**
- 2. Computational details**
- 3. High performance liquid chromatography (HPLC) analysis**

## 1. X-ray crystallography

The CL-20/TFAZ cocrystal **1a** was obtained from the solution in isopropyl acetate at 20 °C. Crystal data, bond lengths, bond angles and dihedral angles of the data collection and refinement are given in Table S1, S2, and S3.

**Table S1 Crystal data and structure refinement for CL-20/TFAZ cocrystal**

| CL-20/TFAZ cocrystal <b>1a</b>                   |                                                                                                                            |
|--------------------------------------------------|----------------------------------------------------------------------------------------------------------------------------|
| Empirical formula                                | C <sub>12</sub> H <sub>7</sub> N <sub>19</sub> O <sub>15</sub>                                                             |
| Formula weight                                   | 657.37                                                                                                                     |
| Temperature/K                                    | 296(2)                                                                                                                     |
| Crystal system                                   | Monoclinic                                                                                                                 |
| Wavelength/Å                                     | 0.71073                                                                                                                    |
| Space group                                      | <i>P</i> 2 <sub>1</sub>                                                                                                    |
| Unit cell dimensions/Å, °                        | <i>a</i> = 8.288 (2), $\alpha$ = 90<br><i>b</i> = 11.555 (3), $\beta$ = 91.113 (6)<br><i>c</i> = 11.805 (3), $\gamma$ = 90 |
| Cell volume/Å <sup>3</sup>                       | 1130.3(5)                                                                                                                  |
| <i>Z</i>                                         | 2                                                                                                                          |
| $\rho_{\text{cal}}/\text{g cm}^{-3}$             | 1.932                                                                                                                      |
| $\mu/\text{mm}^{-1}$                             | 0.177                                                                                                                      |
| <i>F</i> (000)                                   | 664                                                                                                                        |
| Crystal size/mm                                  | 0.35 × 0.21 × 0.13                                                                                                         |
| Crystal description                              | colorless needle                                                                                                           |
| 2 $\theta$ range for data collection/°           | 2.46 to 25.10                                                                                                              |
| Limiting indices                                 | $-8 \leq h \leq 9$ , $-13 \leq k \leq 13$ , $-14 \leq l \leq 11$                                                           |
| Reflections collected                            | 5723                                                                                                                       |
| Max. and min. transmission                       | 0.9770 and 0.9399                                                                                                          |
| Data/restraints/parameters                       | 3885/1/416                                                                                                                 |
| Goodness-of-fit on <i>F</i> <sup>2</sup>         | 0.985                                                                                                                      |
| Final <i>R</i> indexes [ <i>I</i> ≥ 2 $\sigma$ ] | <i>R</i> <sub>1</sub> = 0.0566, w <i>R</i> <sub>2</sub> = 0.0787                                                           |
| <i>R</i> indexes [all data]                      | <i>R</i> <sub>1</sub> = 0.1199, w <i>R</i> <sub>2</sub> = 0.0993                                                           |
| Extinction coefficient                           | 0.0045(8)                                                                                                                  |
| Largest diff. peak and hole/e Å <sup>-3</sup>    | 0.234 and -0.230                                                                                                           |

**Table S2 Bond lengths (Å) for CL-20/TFAZ cocrystal**

|             |          |             |          |
|-------------|----------|-------------|----------|
| N(1)-O(2)   | 1.218(6) | N(13)-C(7)  | 1.293(6) |
| N(1)-O(1)   | 1.226(6) | N(13)-O(13) | 1.385(6) |
| N(1)-N(2)   | 1.361(7) | N(14)-C(8)  | 1.300(6) |
| N(2)-C(4)   | 1.449(7) | N(14)-O(13) | 1.365(6) |
| N(2)-C(1)   | 1.457(7) | N(15)-C(9)  | 1.300(6) |
| N(3)-O(4)   | 1.198(6) | N(15)-O(15) | 1.378(5) |
| N(3)-O(3)   | 1.213(6) | N(16)-C(10) | 1.295(6) |
| N(3)-N(4)   | 1.408(7) | N(16)-O(15) | 1.384(5) |
| N(4)-C(2)   | 1.432(6) | N(17)-C(11) | 1.299(6) |
| N(4)-C(1)   | 1.437(6) | N(17)-O(14) | 1.369(5) |
| N(5)-O(5)   | 1.221(6) | N(18)-C(12) | 1.298(6) |
| N(5)-O(6)   | 1.223(6) | N(18)-O(14) | 1.389(5) |
| N(5)-N(6)   | 1.450(6) | N(19)-C(7)  | 1.360(6) |
| N(6)-C(3)   | 1.471(7) | N(19)-C(12) | 1.369(6) |
| N(6)-C(2)   | 1.480(6) | N(19)-H(19) | 0.86     |
| N(7)-O(8)   | 1.202(6) | C(1)-C(5)   | 1.582(6) |
| N(7)-O(7)   | 1.208(6) | C(1)-H(1)   | 0.98     |
| N(7)-N(8)   | 1.423(6) | C(2)-C(6)   | 1.580(7) |
| N(8)-C(4)   | 1.472(7) | C(2)-H(2)   | 0.98     |
| N(8)-C(5)   | 1.477(7) | C(3)-C(4)   | 1.586(6) |
| N(9)-O(10)  | 1.208(6) | C(3)-H(3)   | 0.98     |
| N(9)-O(9)   | 1.222(6) | C(4)-H(4)   | 0.98     |
| N(9)-N(10)  | 1.394(7) | C(5)-H(5)   | 0.98     |
| N(10)-C(6)  | 1.438(7) | C(6)-H(6)   | 0.98     |
| N(10)-C(5)  | 1.452(7) | C(7)-C(8)   | 1.427(7) |
| N(11)-O(12) | 1.210(6) | C(8)-C(9)   | 1.465(7) |
| N(11)-O(11) | 1.215(6) | C(9)-C(10)  | 1.400(6) |
| N(11)-N(12) | 1.391(6) | C(10)-C(11) | 1.448(6) |
| N(12)-C(3)  | 1.439(7) | C(11)-C(12) | 1.412(7) |
| N(12)-C(6)  | 1.458(7) | N(13)-C(7)  | 1.293(6) |

**Table S3 Bond angles (°) for CL-20/TFAZ cocrystal**

|                   |          |                  |          |
|-------------------|----------|------------------|----------|
| O(2)-N(1)-O(1)    | 127.0(6) | N(4)-C(1)-H(1)   | 111.5    |
| O(2)-N(1)-N(2)    | 116.9(6) | N(2)-C(1)-H(1)   | 111.5    |
| O(1)-N(1)-N(2)    | 116.1(6) | C(5)-C(1)-H(1)   | 111.5    |
| N(1)-N(2)-C(4)    | 120.5(5) | N(4)-C(2)-N(6)   | 108.8(5) |
| N(1)-N(2)-C(1)    | 121.5(5) | N(4)-C(2)-C(6)   | 107.9(5) |
| C(4)-N(2)-C(1)    | 111.5(4) | N(6)-C(2)-C(6)   | 104.9(5) |
| O(4)-N(3)-O(3)    | 126.9(6) | N(4)-C(2)-H(2)   | 111.7    |
| O(4)-N(3)-N(4)    | 115.9(6) | N(6)-C(2)-H(2)   | 111.7    |
| O(3)-N(3)-N(4)    | 117.2(5) | C(6)-C(2)-H(2)   | 111.7    |
| N(3)-N(4)-C(2)    | 118.8(5) | N(12)-C(3)-N(6)  | 104.9(4) |
| N(3)-N(4)-C(1)    | 120.9(5) | N(12)-C(3)-C(4)  | 110.2(5) |
| C(2)-N(4)-C(1)    | 118.7(5) | N(6)-C(3)-C(4)   | 106.7(4) |
| O(5)-N(5)-O(6)    | 128.5(5) | N(12)-C(3)-H(3)  | 111.6    |
| O(5)-N(5)-N(6)    | 115.0(5) | N(6)-C(3)-H(3)   | 111.6    |
| O(6)-N(5)-N(6)    | 116.2(5) | C(4)-C(3)-H(3)   | 111.6    |
| N(5)-N(6)-C(3)    | 115.7(4) | N(2)-C(4)-N(8)   | 99.4(4)  |
| N(5)-N(6)-C(2)    | 113.7(4) | N(2)-C(4)-C(3)   | 113.3(4) |
| C(3)-N(6)-C(2)    | 106.7(4) | N(8)-C(4)-C(3)   | 108.2(4) |
| O(8)-N(7)-O(7)    | 128.3(5) | N(2)-C(4)-H(4)   | 111.8    |
| O(8)-N(7)-N(8)    | 115.4(5) | N(8)-C(4)-H(4)   | 111.8    |
| O(7)-N(7)-N(8)    | 116.1(5) | C(3)-C(4)-H(4)   | 111.8    |
| N(7)-N(8)-C(4)    | 116.0(4) | N(10)-C(5)-N(8)  | 109.8(5) |
| N(7)-N(8)-C(5)    | 116.8(5) | N(10)-C(5)-C(1)  | 107.3(5) |
| C(4)-N(8)-C(5)    | 108.2(4) | N(8)-C(5)-C(1)   | 104.9(5) |
| O(10)-N(9)-O(9)   | 126.7(6) | N(10)-C(5)-H(5)  | 111.5    |
| O(10)-N(9)-N(10)  | 116.4(5) | N(8)-C(5)-H(5)   | 111.5    |
| O(9)-N(9)-N(10)   | 116.7(5) | C(1)-C(5)-H(5)   | 111.5    |
| N(9)-N(10)-C(6)   | 116.7(5) | N(10)-C(6)-N(12) | 111.8(5) |
| N(9)-N(10)-C(5)   | 117.6(5) | N(10)-C(6)-C(2)  | 108.3(5) |
| C(6)-N(10)-C(5)   | 117.3(5) | N(12)-C(6)-C(2)  | 103.7(5) |
| O(12)-N(11)-O(11) | 127.7(6) | N(10)-C(6)-H(6)  | 110.9    |
| O(12)-N(11)-N(12) | 117.7(6) | N(12)-C(6)-H(6)  | 110.9    |
| O(11)-N(11)-N(12) | 114.5(6) | C(2)-C(6)-H(6)   | 110.9    |
| N(11)-N(12)-C(3)  | 120.0(5) | N(13)-C(7)-N(19) | 120.8(5) |
| N(11)-N(12)-C(6)  | 120.7(5) | N(13)-C(7)-C(8)  | 108.7(5) |
| C(3)-N(12)-C(6)   | 108.7(5) | N(19)-C(7)-C(8)  | 130.6(5) |
| C(7)-N(13)-O(13)  | 105.6(5) | N(14)-C(8)-C(7)  | 109.1(5) |
| C(8)-N(14)-O(13)  | 105.6(4) | N(14)-C(8)-C(9)  | 122.5(5) |
| C(9)-N(15)-O(15)  | 104.3(4) | C(7)-C(8)-C(9)   | 128.4(5) |
| C(10)-N(16)-O(15) | 104.5(4) | N(15)-C(9)-C(10) | 109.9(4) |
| C(11)-N(17)-O(14) | 105.9(4) | N(15)-C(9)-C(8)  | 123.4(5) |
| C(12)-N(18)-O(14) | 104.1(5) | C(10)-C(9)-C(8)  | 126.6(4) |
| C(7)-N(19)-C(12)  | 127.5(5) | N(16)-C(10)-C(9) | 109.8(5) |

|                   |          |                   |          |
|-------------------|----------|-------------------|----------|
| C(7)-N(19)-H(19)  | 116.2    | N(16)-C(10)-C(11) | 123.0(5) |
| C(12)-N(19)-H(19) | 116.2    | C(9)-C(10)-C(11)  | 127.2(4) |
| N(14)-O(13)-N(13) | 111.0(4) | N(17)-C(11)-C(12) | 108.4(5) |
| N(17)-O(14)-N(18) | 111.1(4) | N(17)-C(11)-C(10) | 122.7(5) |
| N(15)-O(15)-N(16) | 111.5(4) | C(12)-C(11)-C(10) | 128.9(5) |
| N(4)-C(1)-N(2)    | 113.0(5) | N(18)-C(12)-N(19) | 118.9(5) |
| N(4)-C(1)-C(5)    | 108.5(5) | N(18)-C(12)-C(11) | 110.4(5) |
| N(2)-C(1)-C(5)    | 100.5(5) | N(19)-C(12)-C(11) | 130.6(5) |

**Table S4 Torsion angles (°) for CL-20/TFAZ cocrystal**

|                         |           |                        |           |
|-------------------------|-----------|------------------------|-----------|
| O(2)-N(1)-N(2)-C(4)     | -162.7(5) | N(6)-C(3)-C(4)-N(2)    | -4.9(6)   |
| O(1)-N(1)-N(2)-C(4)     | 18.8(7)   | N(12)-C(3)-C(4)-N(8)   | -0.8(6)   |
| O(2)-N(1)-N(2)-C(1)     | -13.3(8)  | N(6)-C(3)-C(4)-N(8)    | -114.1(5) |
| O(1)-N(1)-N(2)-C(1)     | 168.3(5)  | N(9)-N(10)-C(5)-N(8)   | -92.2(6)  |
| O(4)-N(3)-N(4)-C(2)     | -7.7(9)   | C(6)-N(10)-C(5)-N(8)   | 55.0(6)   |
| O(3)-N(3)-N(4)-C(2)     | 175.2(5)  | N(9)-N(10)-C(5)-C(1)   | 154.4(5)  |
| O(4)-N(3)-N(4)-C(1)     | -173.4(6) | C(6)-N(10)-C(5)-C(1)   | -58.5(7)  |
| O(3)-N(3)-N(4)-C(1)     | 9.5(9)    | N(7)-N(8)-C(5)-N(10)   | 132.2(5)  |
| O(5)-N(5)-N(6)-C(3)     | -164.7(5) | C(4)-N(8)-C(5)-N(10)   | -94.6(5)  |
| O(6)-N(5)-N(6)-C(3)     | 20.8(7)   | N(7)-N(8)-C(5)-C(1)    | -112.8(5) |
| O(5)-N(5)-N(6)-C(2)     | -40.7(7)  | C(4)-N(8)-C(5)-C(1)    | 20.4(6)   |
| O(6)-N(5)-N(6)-C(2)     | 144.8(5)  | N(4)-C(1)-C(5)-N(10)   | 1.7(7)    |
| O(8)-N(7)-N(8)-C(4)     | -154.9(5) | N(2)-C(1)-C(5)-N(10)   | 120.4(5)  |
| O(7)-N(7)-N(8)-C(4)     | 29.5(7)   | N(4)-C(1)-C(5)-N(8)    | -115.0(5) |
| O(8)-N(7)-N(8)-C(5)     | -25.4(7)  | N(2)-C(1)-C(5)-N(8)    | 3.7(7)    |
| O(7)-N(7)-N(8)-C(5)     | 159.0(5)  | N(9)-N(10)-C(6)-N(12)  | 91.9(6)   |
| O(10)-N(9)-N(10)-C(6)   | 25.7(7)   | C(5)-N(10)-C(6)-N(12)  | -55.5(6)  |
| O(9)-N(9)-N(10)-C(6)    | -159.7(6) | N(9)-N(10)-C(6)-C(2)   | -154.4(5) |
| O(10)-N(9)-N(10)-C(5)   | 173.0(6)  | C(5)-N(10)-C(6)-C(2)   | 58.2(7)   |
| O(9)-N(9)-N(10)-C(5)    | -12.3(8)  | N(11)-N(12)-C(6)-N(10) | -121.1(6) |
| O(12)-N(11)-N(12)-C(3)  | -12.7(9)  | C(3)-N(12)-C(6)-N(10)  | 94.3(5)   |
| O(11)-N(11)-N(12)-C(3)  | 171.4(5)  | N(11)-N(12)-C(6)-C(2)  | 122.5(6)  |
| O(12)-N(11)-N(12)-C(6)  | -153.4(6) | C(3)-N(12)-C(6)-C(2)   | -22.2(6)  |
| O(11)-N(11)-N(12)-C(6)  | 30.7(8)   | N(4)-C(2)-C(6)-N(10)   | -0.8(7)   |
| C(8)-N(14)-O(13)-N(13)  | -0.1(6)   | N(6)-C(2)-C(6)-N(10)   | -116.6(5) |
| C(7)-N(13)-O(13)-N(14)  | -0.6(6)   | N(4)-C(2)-C(6)-N(12)   | 118.1(5)  |
| C(11)-N(17)-O(14)-N(18) | -0.5(8)   | N(6)-C(2)-C(6)-N(12)   | 2.3(7)    |
| C(12)-N(18)-O(14)-N(17) | 0.9(8)    | O(13)-N(13)-C(7)-N(19) | -179.3(5) |
| C(9)-N(15)-O(15)-N(16)  | 0.2(8)    | O(13)-N(13)-C(7)-C(8)  | 0.9(6)    |
| C(10)-N(16)-O(15)-N(15) | 0.4(8)    | C(12)-N(19)-C(7)-N(13) | -179.0(6) |
| N(3)-N(4)-C(1)-N(2)     | 111.2(6)  | C(12)-N(19)-C(7)-C(8)  | 0.8(11)   |
| C(2)-N(4)-C(1)-N(2)     | -54.6(7)  | O(13)-N(14)-C(8)-C(7)  | 0.6(6)    |
| N(3)-N(4)-C(1)-C(5)     | -138.3(6) | O(13)-N(14)-C(8)-C(9)  | -177.8(5) |
| C(2)-N(4)-C(1)-C(5)     | 55.9(7)   | N(13)-C(7)-C(8)-N(14)  | -1.0(7)   |
| N(1)-N(2)-C(1)-N(4)     | -64.2(6)  | N(19)-C(7)-C(8)-N(14)  | 179.2(6)  |
| C(4)-N(2)-C(1)-N(4)     | 87.7(5)   | N(13)-C(7)-C(8)-C(9)   | 177.2(6)  |
| N(1)-N(2)-C(1)-C(5)     | -179.6(5) | N(19)-C(7)-C(8)-C(9)   | -2.5(11)  |
| C(4)-N(2)-C(1)-C(5)     | -27.8(6)  | O(15)-N(15)-C(9)-C(10) | -0.7(8)   |
| N(3)-N(4)-C(2)-N(6)     | -109.2(6) | O(15)-N(15)-C(9)-C(8)  | 177.3(6)  |
| C(1)-N(4)-C(2)-N(6)     | 56.9(6)   | N(14)-C(8)-C(9)-N(15)  | 0.3(10)   |
| N(3)-N(4)-C(2)-C(6)     | 137.6(6)  | C(7)-C(8)-C(9)-N(15)   | -177.7(6) |
| C(1)-N(4)-C(2)-C(6)     | -56.4(7)  | N(14)-C(8)-C(9)-C(10)  | 178.0(6)  |
| N(5)-N(6)-C(2)-N(4)     | 133.7(5)  | C(7)-C(8)-C(9)-C(10)   | -0.1(11)  |

|                       |           |                         |           |
|-----------------------|-----------|-------------------------|-----------|
| C(3)-N(6)-C(2)-N(4)   | -97.6(5)  | O(15)-N(16)-C(10)-C(9)  | -0.8(8)   |
| N(5)-N(6)-C(2)-C(6)   | -111.1(5) | O(15)-N(16)-C(10)-C(11) | 178.5(6)  |
| C(3)-N(6)-C(2)-C(6)   | 17.6(6)   | N(15)-C(9)-C(10)-N(16)  | 1.0(9)    |
| N(11)-N(12)-C(3)-N(6) | -111.1(5) | C(8)-C(9)-C(10)-N(16)   | -177.0(6) |
| C(6)-N(12)-C(3)-N(6)  | 33.9(5)   | N(15)-C(9)-C(10)-C(11)  | -178.3(7) |
| N(11)-N(12)-C(3)-C(4) | 134.5(5)  | C(8)-C(9)-C(10)-C(11)   | 3.8(12)   |
| C(6)-N(12)-C(3)-C(4)  | -80.6(6)  | O(14)-N(17)-C(11)-C(12) | -0.2(7)   |
| N(5)-N(6)-C(3)-N(12)  | 96.0(5)   | O(14)-N(17)-C(11)-C(10) | -180.0(6) |
| C(2)-N(6)-C(3)-N(12)  | -31.5(5)  | N(16)-C(10)-C(11)-N(17) | -3.2(11)  |
| N(5)-N(6)-C(3)-C(4)   | -147.1(4) | C(9)-C(10)-C(11)-N(17)  | 175.9(7)  |
| C(2)-N(6)-C(3)-C(4)   | 85.4(5)   | N(16)-C(10)-C(11)-C(12) | 177.0(7)  |
| N(1)-N(2)-C(4)-N(8)   | -167.6(5) | C(9)-C(10)-C(11)-C(12)  | -3.8(12)  |
| C(1)-N(2)-C(4)-N(8)   | 40.2(5)   | O(14)-N(18)-C(12)-N(19) | 179.3(6)  |
| N(1)-N(2)-C(4)-C(3)   | 77.9(6)   | O(14)-N(18)-C(12)-C(11) | -1.0(8)   |
| C(1)-N(2)-C(4)-C(3)   | -74.4(6)  | C(7)-N(19)-C(12)-N(18)  | -178.9(7) |
| N(7)-N(8)-C(4)-N(2)   | 97.8(5)   | C(7)-N(19)-C(12)-C(11)  | 1.5(12)   |
| C(5)-N(8)-C(4)-N(2)   | -35.7(5)  | N(17)-C(11)-C(12)-N(18) | 0.8(8)    |
| N(7)-N(8)-C(4)-C(3)   | -143.8(4) | C(10)-C(11)-C(12)-N(18) | -179.4(7) |
| C(5)-N(8)-C(4)-C(3)   | 82.7(5)   | N(17)-C(11)-C(12)-N(19) | -179.6(7) |
| N(12)-C(3)-C(4)-N(2)  | 108.4(6)  | C(10)-C(11)-C(12)-N(19) | 0.2(13)   |

## 2. Computational details

Computations were performed with the Gaussian 09 (Revision B. 01) suite of programs.<sup>1</sup> Geometry optimization was performed with the hybrid meta-exchange correlation functional M062x at 6-311+G (d,p) level. The isodesmic reaction used for the prediction of gas-phase heats of formation (HOF) of CL-20, TFAZ and CL-20/TFAZ cocrystal are shown in Scheme S1. The experimental HOF of the reference compounds used in the isodesmic reactions are listed in Table S5.

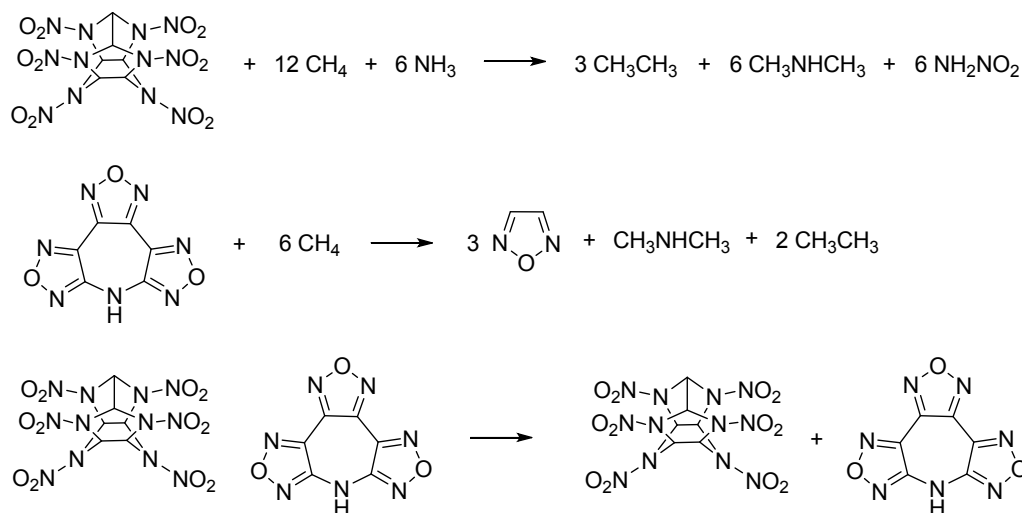

**Scheme S1** Isodesmic reactions used to obtain the HOFs of CL-20/TFAZ cocrystal and co-formers at 298K

**Table S5** Experimental gas-phase heats of formation for reference compounds at 298 K<sup>2,3</sup>

| Compd.                            | $\Delta H_{f,\text{gas}} / \text{kJ mol}^{-1}$ |
|-----------------------------------|------------------------------------------------|
| CH <sub>4</sub>                   | -74.6                                          |
| NH <sub>3</sub>                   | -46.1                                          |
| CH <sub>3</sub> CH <sub>3</sub>   | -84.0                                          |
| CH <sub>3</sub> NHCH <sub>3</sub> | -18.8                                          |
| NH <sub>2</sub> NO <sub>2</sub>   | -3.9                                           |
| furazan                           | 196.27                                         |

For the isodesmic reaction, the heat of reaction ( $\Delta H_{298\text{K}}$ ) is calculated from Eq. (1):<sup>4</sup>

$$\Delta H_{298\text{K}} = \Delta E_{298\text{K}} + \Delta(PV) = \Delta E_0 + \Delta ZPE + \Delta H_T + \Delta nRT \quad (1)$$

where  $\Delta E_0$  is the change in total energy between the products and the reactants at 0 K;  $\Delta ZPE$  is the difference between the zero-point energies of the products and the reactants at 0 K;  $\Delta H_T$  is thermal correction from 0 to 298 K. The  $\Delta(PV)$  term in Eq. (3) equals  $\Delta nRT$  for the reactions of ideal gas. For the isodesmic reactions,  $\Delta n=0$ , so  $\Delta(PV)=0$ .

Furthermore, the solid-state HOF ( $\Delta H_{f,\text{solid}}$ ) can be calculated by Eq. (2):

$$\Delta H_{f,\text{solid}} = \Delta H_{f,\text{gas}} - \Delta H_{\text{sub}} \quad (2)$$



Hirshfeld surface is constructed based on the electron distribution, calculated as the sum of spherical atom electron densities.<sup>5</sup> The normalized contact distance ( $d_{norm}$ ) can be determined by Eq. (3):<sup>6</sup>

$$d_{norm} = \frac{d_i - r_i^{vdW}}{r_i^{vdW}} + \frac{d_e - r_e^{vdW}}{r_e^{vdW}} \quad (3)$$

Where  $d_i$  and  $d_e$  are the distances from the Hirshfeld surface to the nearest atoms inside and outside the surface,  $r_i^{vdW}$  and  $r_e^{vdW}$  denote the van der Waals radii of the appropriate atoms interior and exterior to the surface, respectively. All the Hirshfeld surfaces and their 2D fingerprint plots were created with Crystal Explorer 3.1.<sup>7</sup>

### 3. High performance liquid chromatography (HPLC) analysis

The HPLC analysis for CL-20/TFAZ cocrystal (**1a** and **1b**) was performed by Shimadzu LC-2010A apparatus by using acetone as mobile phase. The chromatogram and corresponding parameters were presented in Fig. S1 and Table S6, respectively.

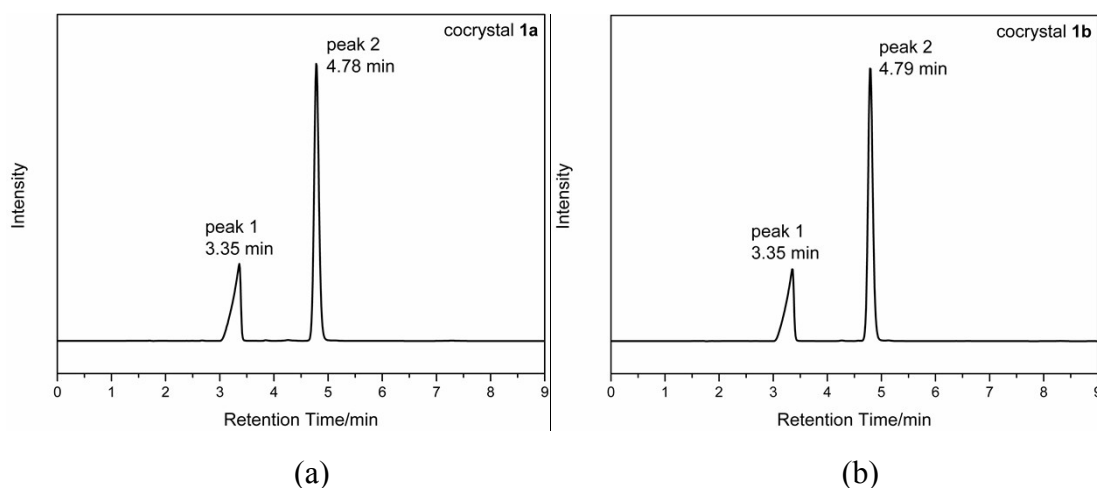

**Fig. S1** HPLC chromatogram of CL-20/TFAZ cocrystal: (a) **1a**; (b) **1b**

**Table S6** The peak area and mass percentage of CL-20/TFAZ cocrystal

| coccrystal <b>1a</b> |          |         |        | coccrystal <b>1b</b> |          |         |        |
|----------------------|----------|---------|--------|----------------------|----------|---------|--------|
| peak                 | compound | area    | mass/% | peak                 | compound | area    | mass/% |
| 1                    | TFAZ     | 2610576 | 33.24  | 1                    | TFAZ     | 2639805 | 33.17  |
| 2                    | CL-20    | 5243142 | 66.76  | 2                    | CL-20    | 5318606 | 66.83  |

### References

- 1 M. J. Frisch, G. W. Trucks, H. B. Schlegel, G. E. Scuseria, M. A. Robb, J. R. Cheeseman, G. Scalmani, V. Barone, B. Mennucci, G. A. Petersson, H. Nakatsuji, M. Caricato, X. Li, H. P. Hratchian, A. F. Izmaylov, J. Bloino, G. Zheng, J. L. Sonnenberg, M. Hada, M. Ehara, K. Toyota, R. Fukuda, J. Hasegawa, M. Ishida, T. Nakajima, Y. Honda, O. Kitao, H. Nakai, T. Vreven Jr., J. A. Montgomery, J. E. Peralta, F. Ogliaro, M. Bearpark, J. J. Heyd, E. Brothers, K. N. Kudin, V. N. Staroverov, R. Kobayashi, J. Normand, K. Raghavachari, A. Rendell, J. C. Burant, S. S. Iyengar, J. Tomasi, M. Cossi, N.

- Rega, J. M. Millam, M. Klene, J. E. Knox, J. B. Cross, V. Bakken, C. Adamo, J. Jaramillo, R. Gomperts, R. E. Stratmann, O. A. Yazyev, A. J. Austin, R. Cammi, C. Pomelli, J. W. Ochterski, R. L. Martin, K. Morokuma, V. G. Zakrzewski, G. A. Voth, P. Salvador, J. J. Dannenberg, S. Dapprich, A. D. Daniels, O. Farkas, J. B. Foresman, J. V. Ortiz, J. Cioslowski and D. J. Fox, Gaussian 09, Revision B. 01, Gaussian, Inc, Wallingford, CT, USA, 2009.
- 2 J. A. Dean, *LANGE'S Handbook of Chemistry, 15th ed.*, McGraw-Hill Book Co., New York, 1999.
  - 3 H. Y. Afeefy, J. F. Liebman and S. E. Stein, Neutral thermochemical data, in: P.J. Linstrom, W.G. Mallard (Eds.), NIST Chemistry Web Book, NIST Standard Reference Database Number 69, National Institute of Standards and Technology, Gaithersburg, MD, 2000. <<http://webbook.nist.gov>>.
  - 4 P.-Y. Chen, L. Zhang, S.-G. Zhu and G.-B. Cheng, *Can. J. Chem.*, 2015, **93**, 632.
  - 5 J. W. Cui, Y. Q. Zhao, Z. C. Hao and G. H. Cui, *Res. Chem. Intermed.*, 2017, **44**, 721–738.
  - 6 M. Nikpour, M. Mirzaei, Y. G. Chen, A. A. Kaju and M. Bakavoli, *Inorg. Chem. Commun.*, 2009, **12**, 879–882.
  - 7 S. K. Wolff, D. J. Grimwood, J. J. McKinnon, D. Jayatilaka and M. A. Spackman, *Crystal Explorer 3.1*, University of Western Australia, Perth, Australia, 2009.
